# Supplementary material for: Nuclear receptor NR2F6 inhibition potentiates responses to PD-L1/PD-1 cancer immune checkpoint blockade
Source: PubMed Central journal article supplement (PMC5906604; doi:10.1038/s41467-018-04004-2), 2018-04-18
Supplement: 41467_2018_4004_MOESM1_ESM.pdf [file 41467_2018_4004_MOESM1_ESM.pdf]

Supplementary Information PDF

Nuclear Receptor NR2F6 Inhibition Potentiates Responses  
to PD-L1/PD-1 Cancer Immune Checkpoint Blockade

Victoria Klepsch et al.

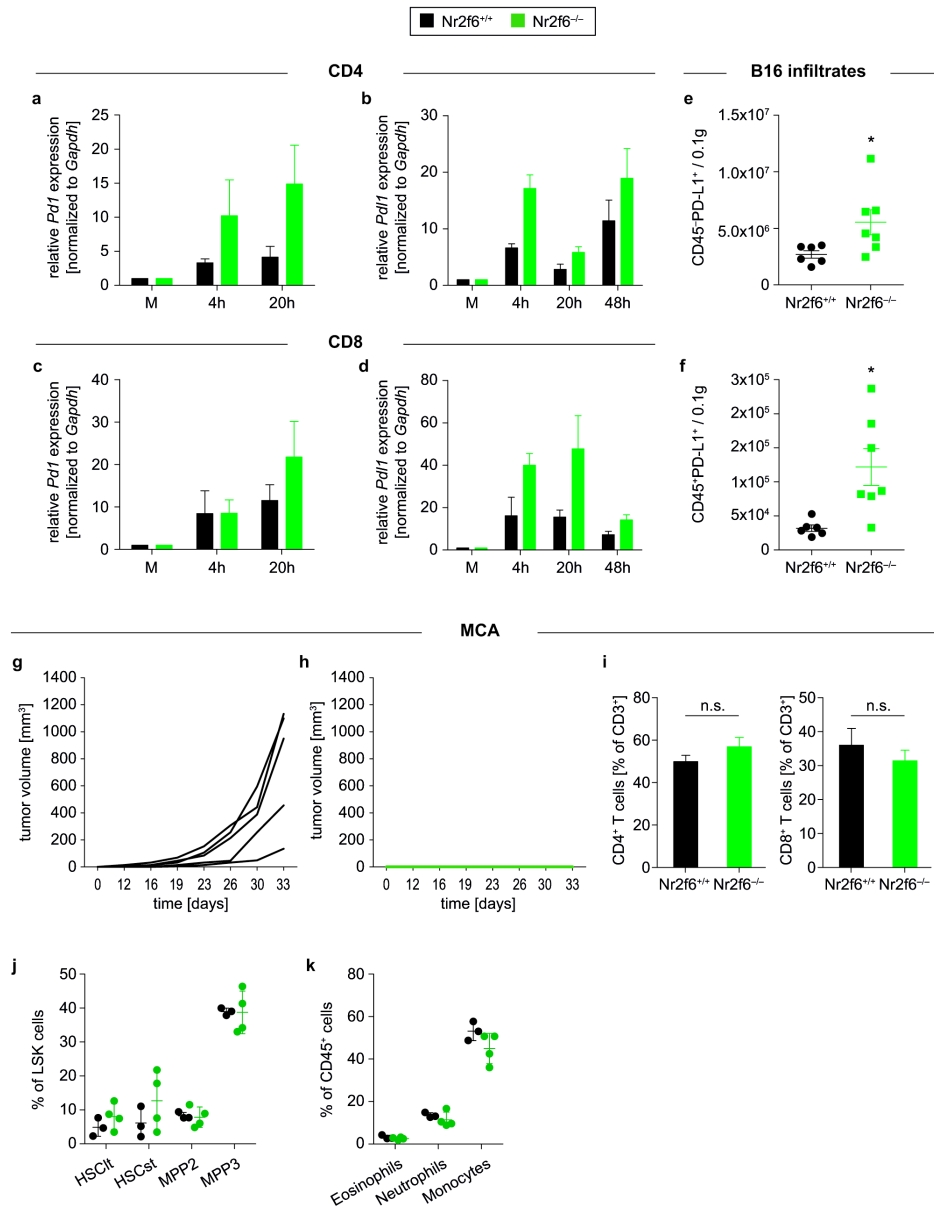

**Supplementary Figure 1:** NR2F6 inhibition led to an elevated *Pd1* and *Pdl1* expression in CD4<sup>+</sup> and CD8<sup>+</sup> T cells *ex vivo*. *In vitro* qRT-PCR analysis of *Pd1* mRNA (A,  $p=0.045$ , ANOVA), *Pdl1* mRNA (B,  $p=0.012$ , ANOVA) in wild-type and *Nr2f6*-deficient CD4<sup>+</sup> T cells as well as in CD8<sup>+</sup> T cells (C n.s. D  $p=0.045$ , ANOVA) during activation with anti-CD3 mAb (5  $\mu$ g) and anti-CD28 mAb (1  $\mu$ g) at the indicated time points ( $n=4$ ). (E) Increased absolute cell numbers of B16-OVA tumor-infiltrating CD45<sup>+</sup>PD-L1<sup>+</sup> non-immune cells ( $p=0.041$ , unpaired t-test) and (F) CD45<sup>+</sup>PD-L1<sup>+</sup> immune cells ( $p=0.011$ , unpaired t-test) per 0.1 g of tumor tissue harvested on d14 after tumor inoculation (*Nr2f6*<sup>+/+</sup>  $n=6$ , *Nr2f6*<sup>-/-</sup>  $n=7$ ). Single tumor growth curves of *Nr2f6*<sup>+/+</sup> (G) and *Nr2f6*<sup>-/-</sup> (H) mice injected with a 3-MCA generated wild-type cell line (respective to Fig.1D). (I) No difference of CD4 and CD8 distribution in *Nr2f6*<sup>-/-</sup> mice compared to controls in the CD3<sup>+</sup> pool of TILs from MCA-induced tumors were analysed at the endpoint ( $n=5$ ). (J) Frequency of myeloid stem cell and progenitor populations as HSC<sup>L</sup>, HSC<sup>ST</sup>, MPP2 and MPP3 in the BM of *Nr2f6*<sup>+/+</sup> or *Nr2f6*<sup>-/-</sup> B16-tumor bearing mice on day 14. (K) Frequency of myeloid cell populations such as eosinophils, neutrophils or monocytes in the BM of *Nr2f6*<sup>+/+</sup> or *Nr2f6*<sup>-/-</sup> tumor bearing mice on day 14 ( $n=4$ ). Results shown are derived from at least two independent experiments. Error bars represent the mean  $\pm$  SEM.

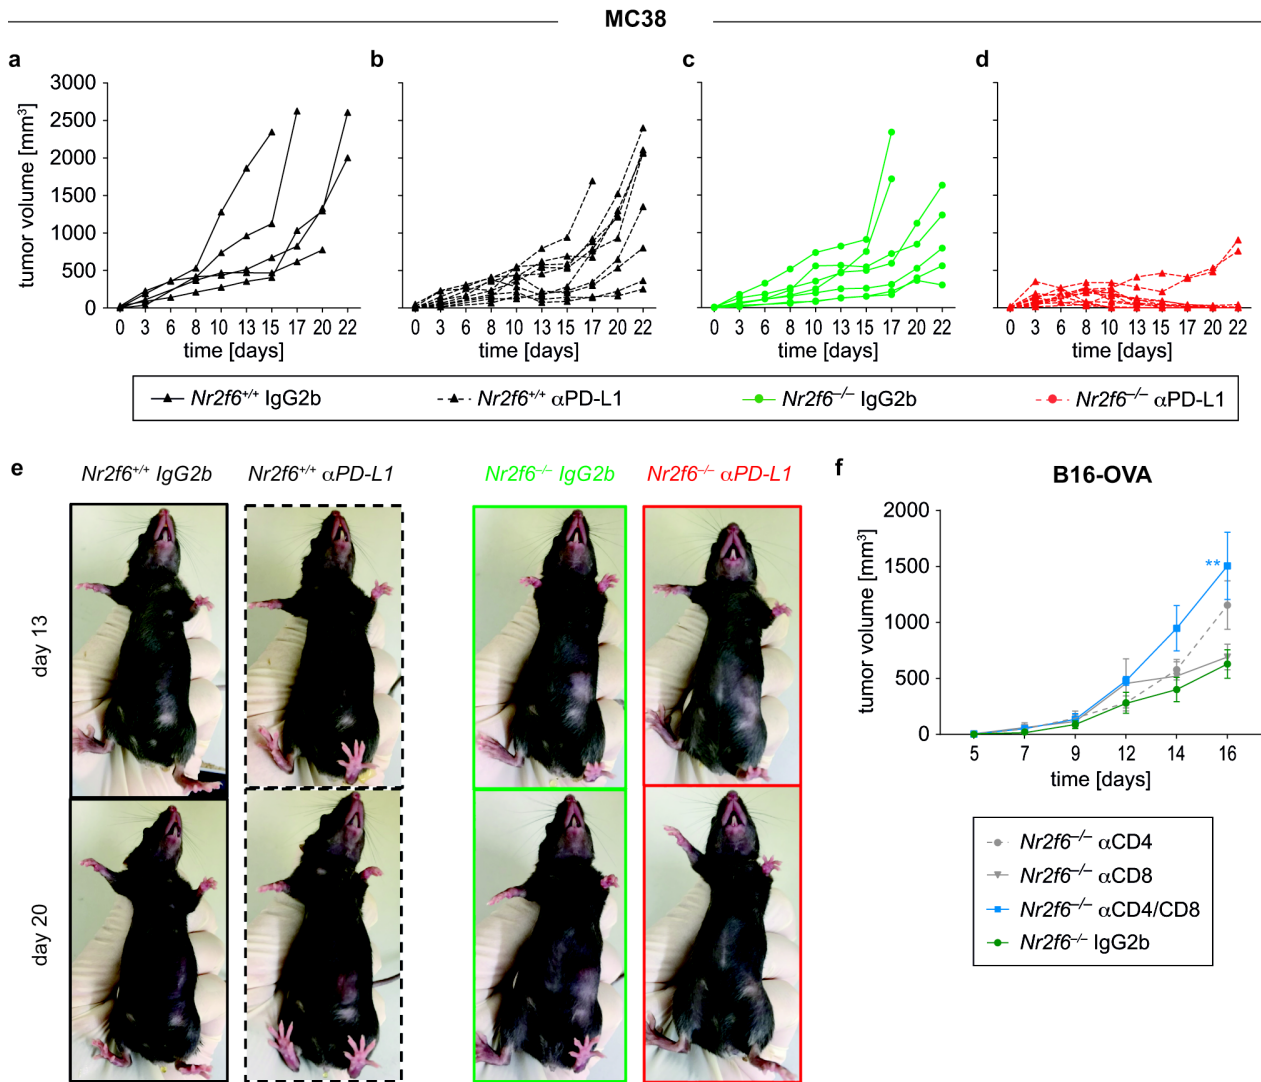

**Supplementary Figure 2:** (A-D) Single tumor growth curves in experiments shown in Fig.2C and D of (A) *Nr2f6*<sup>+/+</sup> mice receiving isotype control (Rat IgG2b), (B) *Nr2f6*<sup>+/+</sup> mice receiving antibody against PD-L1, (C) *Nr2f6*<sup>-/-</sup> mice receiving isotype control (Rat IgG2b) and (D) *Nr2f6*<sup>-/-</sup> mice receiving an antibody against PD-L1. (E) Representative pictures of tumor-bearing mice on d13 and d20 after MC38 tumor injection of the four already described groups. (F) Tumor cell growth kinetics in *Nr2f6*<sup>-/-</sup> mice treated with CD8<sup>+</sup> (grey triangle, p=0.9524) CD4<sup>+</sup> (grey circle, p=0.051, ANOVA), CD4<sup>+</sup>/CD8<sup>+</sup> combination (blue, p=0.0017, ANOVA) neutralizing antibodies or rat IgG2b (green) and injected with 1x10<sup>5</sup> B16-OVA melanoma cells (n=4). Results shown are derived from at least two independent experiments. Error bars represent the mean ± SEM.

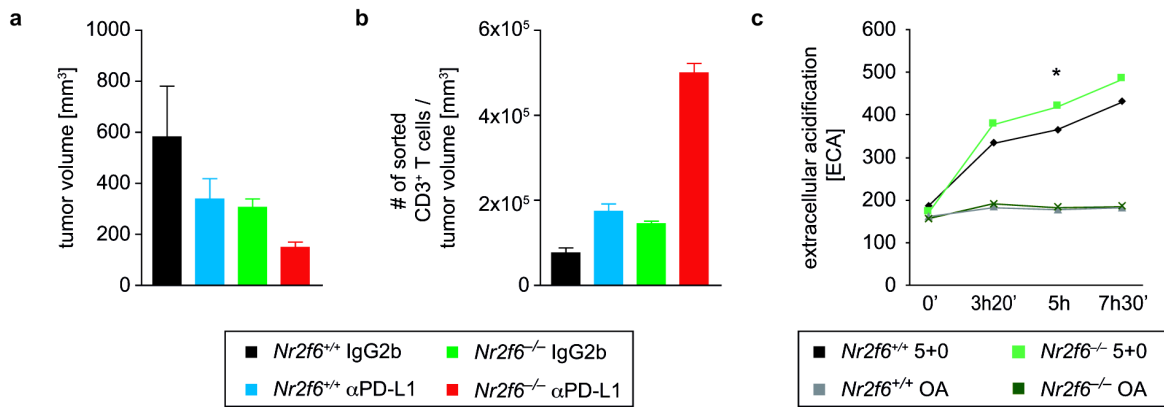

**d** *Nr2f6*<sup>+/+</sup> αPD-L1 vs. *Nr2f6*<sup>+/+</sup> IgG2b

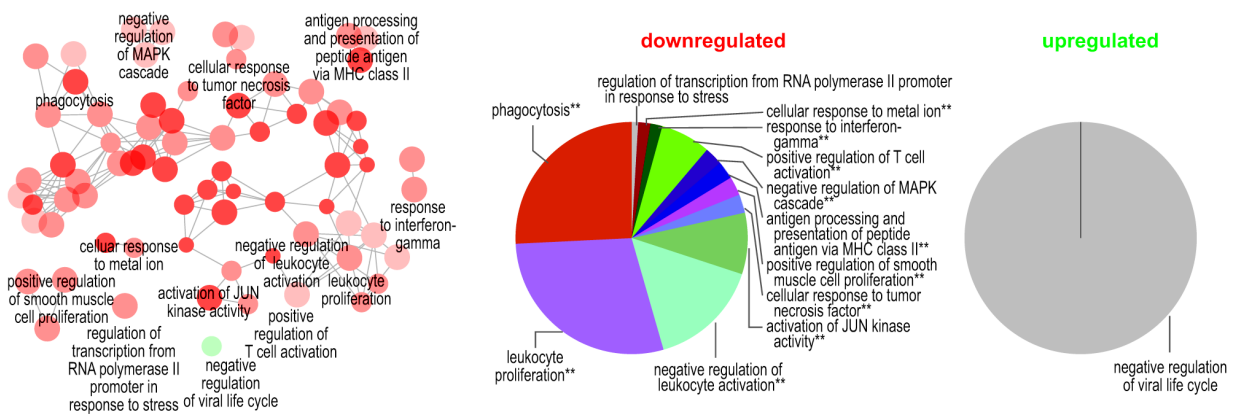

**e** *Nr2f6*<sup>-/-</sup> IgG2b vs. *Nr2f6*<sup>+/+</sup> IgG2b

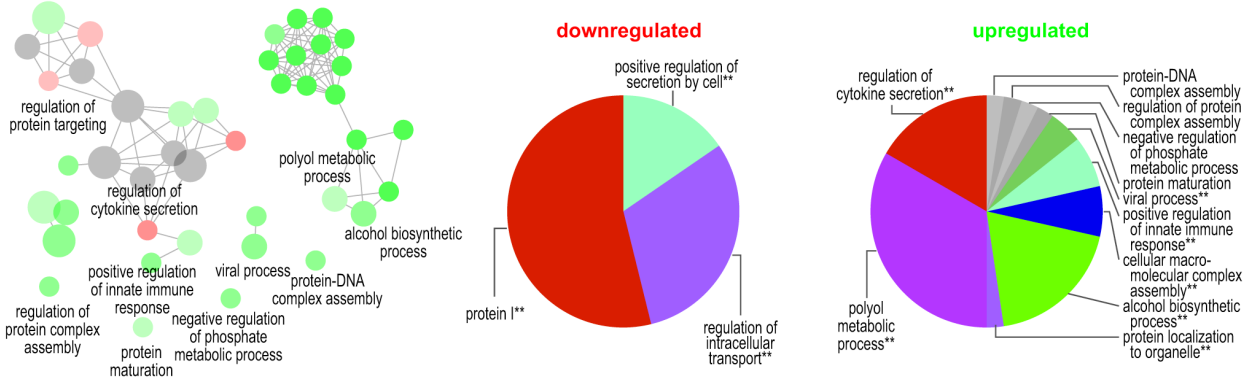

**f** *Nr2f6*<sup>-/-</sup> αPD-L1 vs. *Nr2f6*<sup>-/-</sup> IgG2b

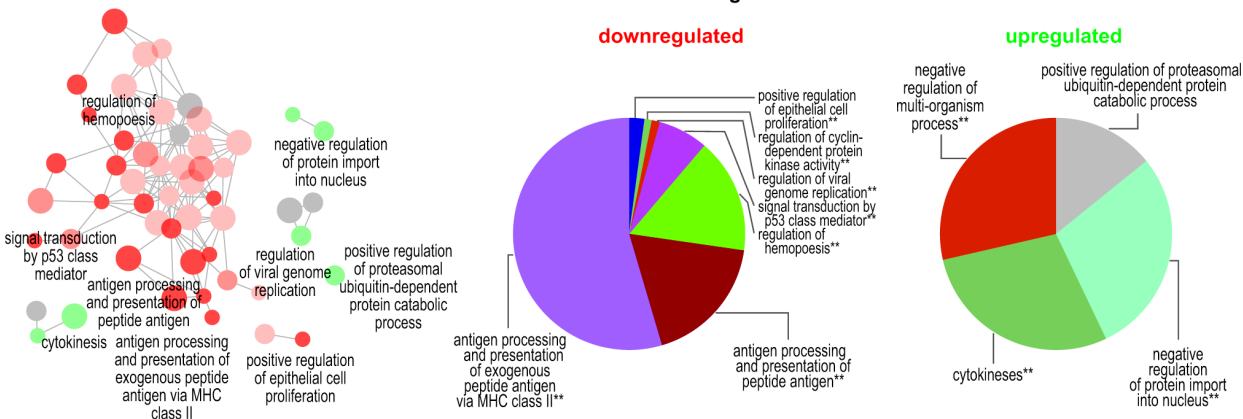

Supplementary Figure 3

**Supplementary Figure 3:** (A) Tumor volume ( $\text{mm}^3$ ) of  $5 \times 10^5$  B16-OVA melanoma cells injected s.c. in *Nr2f6*<sup>+/+</sup> or *Nr2f6*<sup>-/-</sup> mice treated with IgG2b (n=4) or  $\alpha$ PD-L1 (n=8) with significant differences between *Nr2f6*-deficient mice treated with IgG2b or  $\alpha$ PD-L1 ( $p=0.013$ , unpaired t-test) and  $\alpha$ PD-L1-treated *Nr2f6*<sup>+/+</sup> and *Nr2f6*<sup>-/-</sup> mice ( $p=0.033$ , unpaired t-test). (B) As well as significant differences of absolute sorted CD3<sup>+</sup> cell numbers in *Nr2f6*<sup>-/-</sup> mice treated with  $\alpha$ PD-L1 (compared to *Nr2f6*<sup>-/-</sup> IgG2b  $p<0.0001$  or *Nr2f6*<sup>+/+</sup> IgG2b  $p<0.0001$ , unpaired t-test), additionally  $\alpha$ PD-L1 treatment in wild-type mice also revealed significantly increased CD3<sup>+</sup> cell numbers ( $p=0.003$ , unpaired t-test) compared to the wild-type IgG2b group; likewise, monotherapy of *Nr2f6* loss showed elevated infiltration of CD3<sup>+</sup> T cells ( $p=0.024$ , unpaired t-test). (C) MACS sorted CD3<sup>+</sup> T cells of wild-type (black, n=5) and *Nr2f6*<sup>-/-</sup> (green, n=5) mice were stimulated with anti-CD3 / anti-CD28 for three days and showed a significant higher extracellular acidification ( $p=0.031$ , ANOVA) using the MitoXpress® – pH Xtra™ Glycolysis Assay Kit from Luxcel (OA = Oxamic acid, negative control). (D-F) Additional data of RNAseq experiments showing ClueGO gene ontology analysis of significantly differentially expressed genes in the control groups of sorted CD3<sup>+</sup> TILs of B16-OVA tumors (D). Results shown are derived from at least two independent experiments. Error bars represent the mean  $\pm$  SEM.

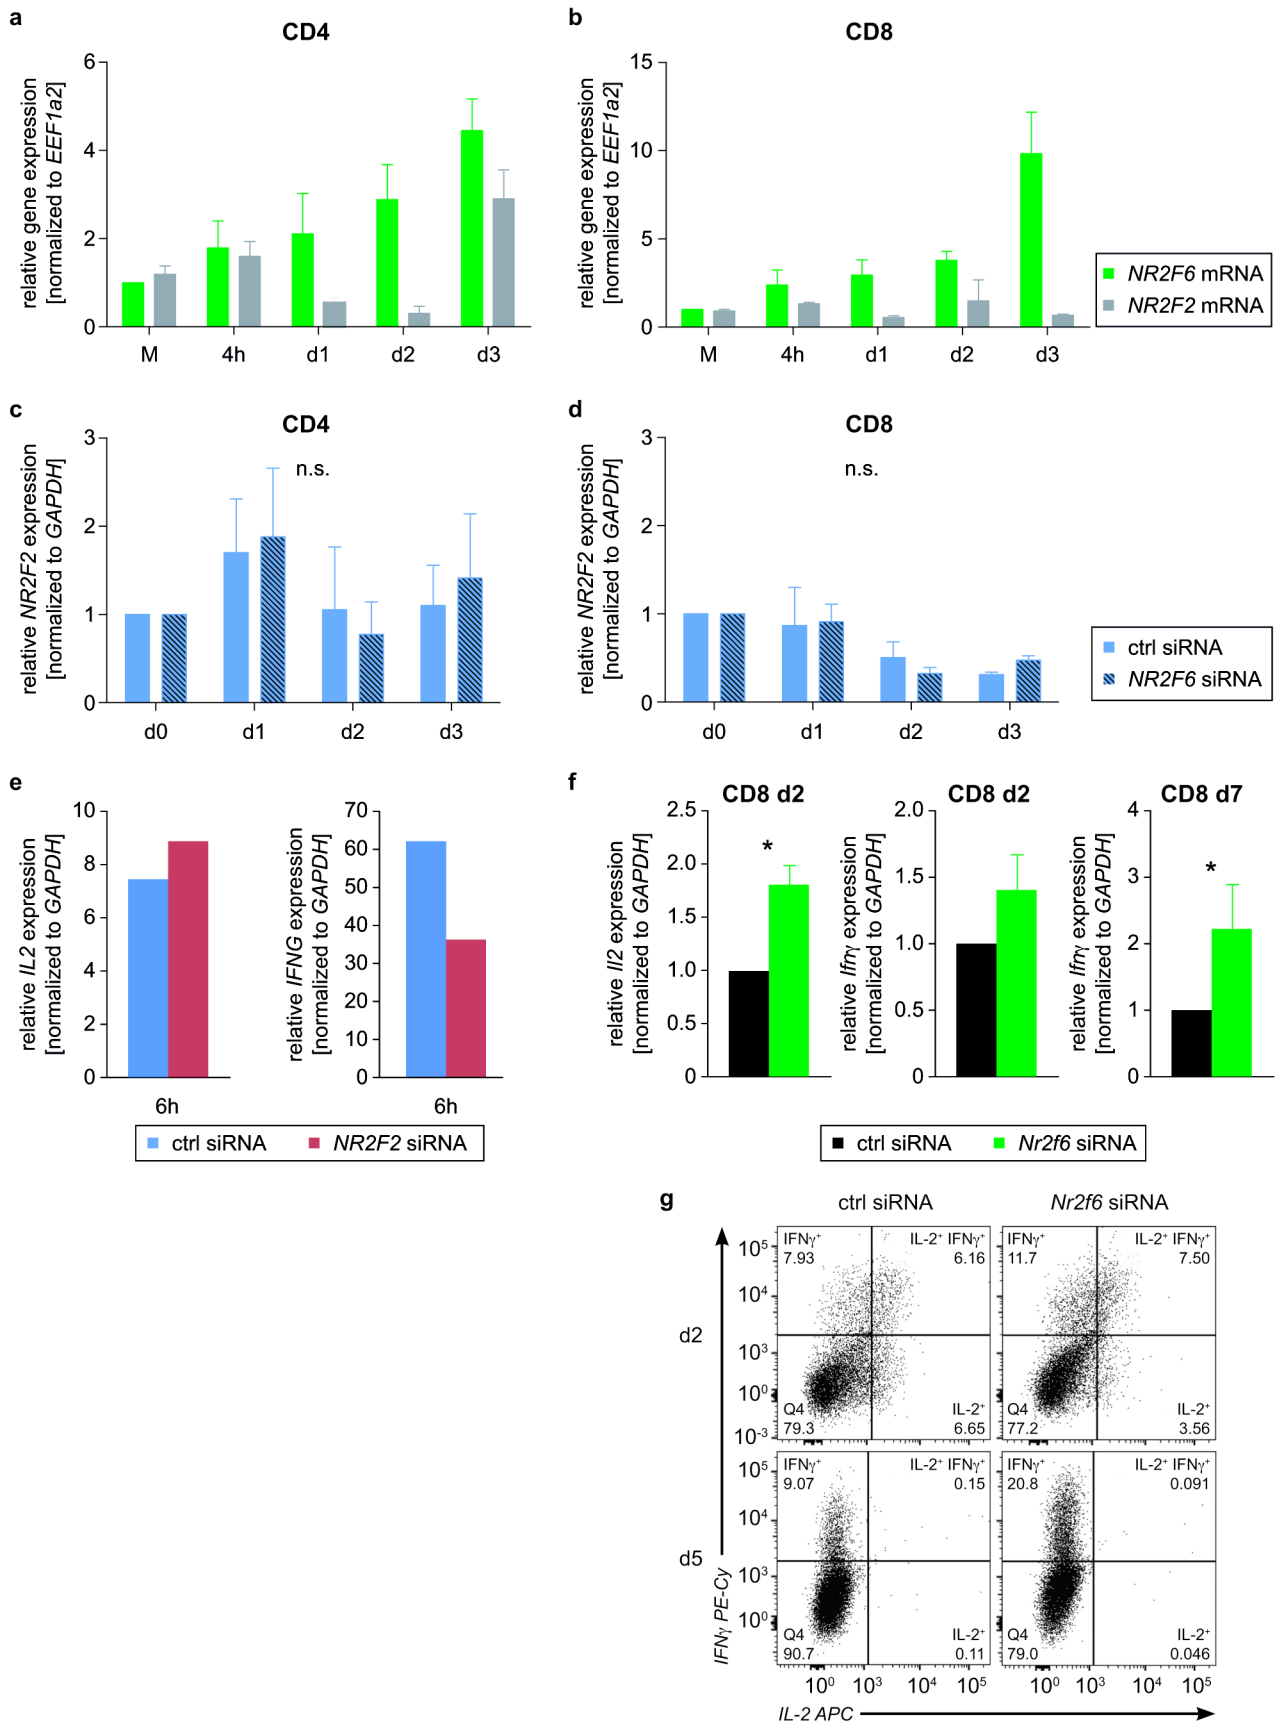

Supplementary Figure 5

**Supplementary Figure 5:** Human *NR2F6* mRNA (green) is upregulated upon stimulation of CD4<sup>+</sup> (A) or CD8<sup>+</sup> (B) isolated T cells from human PBMCs in a time-dependent manner (n=3; CD4 p=0.0084, CD8 p=0.001, ANOVA). The two other family members of the COUP-TF nuclear receptor family are not significantly upregulated upon stimulation of T cells (A,B shows mRNA expression of *NR2F2* (blue) and *NR2F1* is not detectable in human T cells). Upon gene silencing of *NR2F6* via siRNA transfection, the expression of *NR2F2* is not upregulated to rescue the loss of *NR2F6* compared to ctrl siRNA in CD4<sup>+</sup> (C) and CD8<sup>+</sup> (D) T cells stimulated over 3 days (n=3). (E) siRNA-mediated knock-down of the family member *NR2F2* in T cells does not alter their function upon stimulation measured by *IL2* and *IFNG* mRNA expression compared to *control* siRNA, indicating a non-relevant role of *NR2F2* in human T cells. (F) Mouse CD8<sup>+</sup> T cells were nucleofected with *Nr2f6* siRNA or *control* siRNA as indicated (n=3). Cytokine expression levels were analyzed by qRT-PCR on day 2 after transfection following 4 hours of PDBu (0.05 µg/ml)/ionomycin (0.5 µg/ml) stimulation or on day 7 after transfection during activation with anti-CD3 mAb (5µg) and anti-CD28 mAb (1 µg) and *Nr2f6* siRNA treated cells showed significant elevated levels of *Il2* (p=0.02, unpaired t-test) on day 2 and *Ifny* on day 7 (p=0.02, unpaired t-test) and a trend for *Ifng* on day 2. (G) Representative dot plots show elevated levels of IFN $\gamma$  on day 2 (PDBu/ionomycin) and day 5 (anti-CD3/CD28) after transfection in CD8<sup>+</sup> cells transfected with *Nr2f6* siRNA in comparison to *control* siRNA. Scale bars = 200 µm (a-d, upper panels) and 100 µm (a-d, lower panels). Results shown are derived from at least two independent experiments. Error bars represent the mean  $\pm$  SEM.

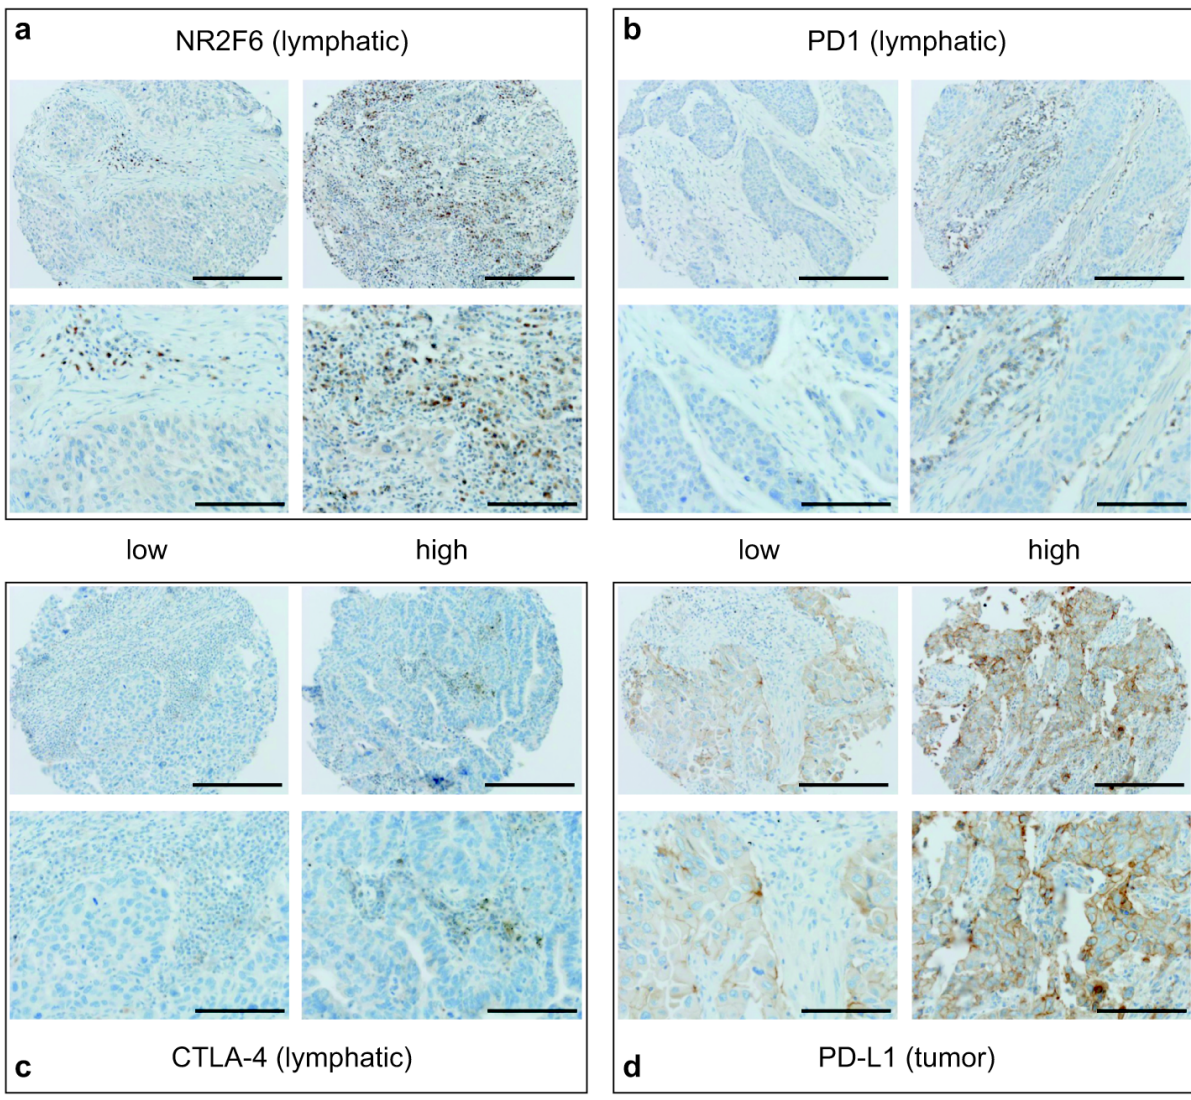

**Supplementary Figure 6:** Representative IHC images for all antigens reported in the multiplex analysis of Fig.6E are shown. Scale bars = 200 µm (a-d, upper panels) and 100 µm (a-d, lower panels).



Uncropped immunoblots used in Fig. 5i

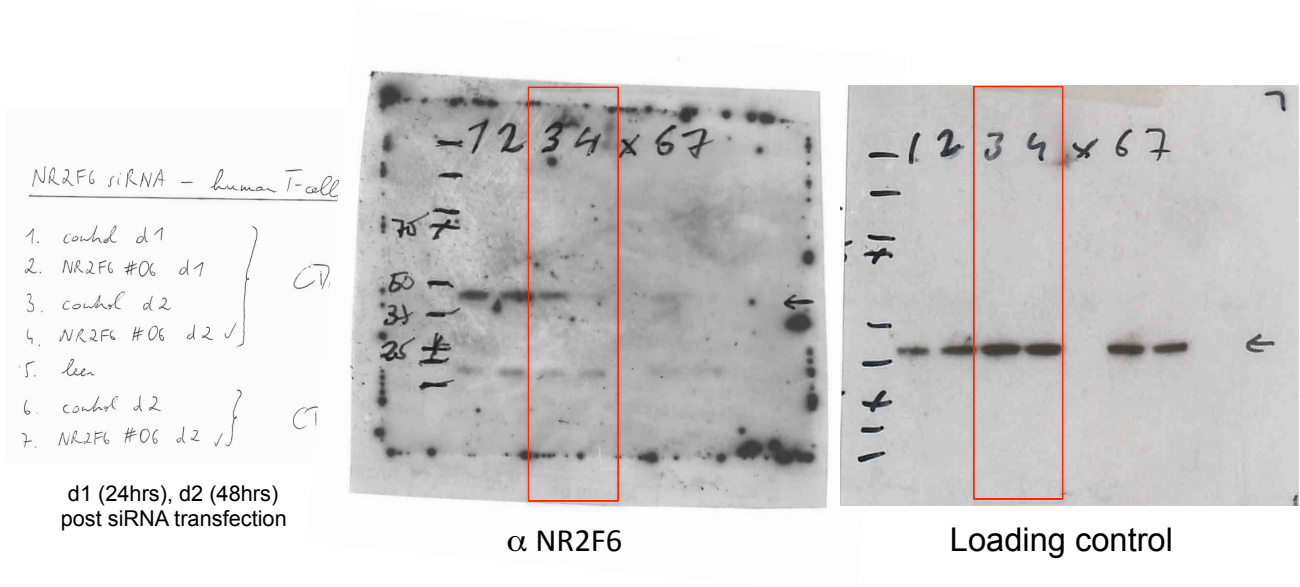

Supplementary Figure 7: Source data of western blots in Fig. 5i

## Supplementary Table 1: *Nr2f6*<sup>-/-</sup> IgG2b vs *Nr2f6*<sup>+/+</sup> IgG2b

| p-value | pathway                                              | associated genes          |
|---------|------------------------------------------------------|---------------------------|
| 0,0003  | Cell cycle                                           | Ptg1; Mad2l1; Ccna2; Mcm2 |
| 0,0008  | Oxidative phosphorylation                            | Ndufv3; Gzmb; Atp5f1      |
| 0,0040  | APC/C:Cdc20 mediated degradation of mitotic proteins | Ptg1; Mad2l1              |
| 0,0053  | Regulation of DNA replication                        | Ccna2; Mcm2               |
| 0,0097  | Separation of Sister Chromatids                      | Ptg1; Mad2l1; Cenpa       |

| p-value | pathway                           | associated genes    |
|---------|-----------------------------------|---------------------|
| 0,0005  | Growth hormone receptor signaling | Jak2; Cish          |
| 0,0006  | Steroid biosynthesis              | Lipa; Ebp           |
| 0,0009  | Morphine addiction                | Pde7a; Gnb2; Pde3b  |
| 0,0041  | Jak-STAT signaling pathway        | Jak2; Cish; Il4ra   |
| 0,0053  | Purine metabolism                 | Pde7a; Pola1; Pde3b |
| 0,0089  | Kit Receptor Signaling Pathway    | Jak2; Cish          |
| 0,0054  | Endometrial cancer                | Tcf7; Axin1         |
| 0,0061  | Basal cell carcinoma              | Tcf7; Axin1         |
| 0,0081  | Colorectal cancer                 | Tcf7; Axin1         |

## Supplementary Table 2: *Nr2f6*<sup>-/-</sup> PD-L1 vs *Nr2f6*<sup>+/+</sup> PD-L1

| p-value | pathway                                      | associated genes                                                                                                                           |
|---------|----------------------------------------------|--------------------------------------------------------------------------------------------------------------------------------------------|
| 0,0000  | Osteoclast differentiation                   | Nfatc1; Nfatc2; Fhl2; Stat1; Junb; Socs3; Cybb; Fosl2; Ppp3cc                                                                              |
| 0,0001  | Natural killer cell mediated cytotoxicity    | Nfatc1; Nfatc2; Klrc2; Cd48; Klra3; Ppp3cc; Klrd1                                                                                          |
| 0,0004  | Interferon gamma signaling                   | Socs3; Stat1; Camk2b                                                                                                                       |
| 0,0006  | T cell receptor signaling pathway            | Nfatc1; Nfatc2; Cd28; Il10; Prkcq; Ppp3cc                                                                                                  |
| 0,0009  | Immune System                                | Nfatc1; Nfatc2; Adcy7; Stat1; Socs3; Hectd3; H2-DMa; Dapp1; Camk2b; Rps6kb2; Cybb; Ripk3; Cd28; Tnfaip3; Prkacb; Prkcq; Klrc2; Zbp1; Klrd1 |
| 0,0016  | Graa-versus-host disease                     | H2-DMa; Cd28; Klra3; Klrd1                                                                                                                 |
| 0,0025  | Innate Immune System                         | Nfatc1; Nfatc2; Cd28; Klrd1; Adcy7; Zbp1; Tnfaip3; Rps6kb2; Ripk3; Klrc2; Prkacb; Prkcq                                                    |
| 0,0029  | Wnt signaling pathway                        | Nfatc1; Nfatc2; Siah1b; Camk2b; Prkacb; Ppp3cc                                                                                             |
| 0,0033  | DAP12 signaling                              | Cd28; Klrd1; Adcy7; Rps6kb2; Klrc2; Prkacb                                                                                                 |
| 0,0042  | Interleukin-6 signaling                      | Socs3; Stat1                                                                                                                               |
| 0,0042  | Type II interferon signaling (IFNG)          | Cybb; Socs3; Stat1                                                                                                                         |
| 0,0045  | TNF signaling pathway                        | Ripk3; Junb; Tnfaip3; Socs3; Ccl5                                                                                                          |
| 0,0049  | Signaling by PDGF                            | Cd28; Stat1; Rps6kb2; Adcy7; Spp1; Prkacb                                                                                                  |
| 0,0051  | Regulation of IFNG signaling                 | Socs3; Stat1                                                                                                                               |
| 0,0059  | B cell receptor signaling pathway            | Nfatc1; Nfatc2; Dapp1; Ppp3cc                                                                                                              |
| 0,0077  | Intestinal immune network for IgA production | Il10; H2-DMa; Cd28                                                                                                                         |
| 0,0094  | PKA activation                               | Adcy7; Prkacb                                                                                                                              |

  

| p-value | pathway                                                               | associated genes                                     |
|---------|-----------------------------------------------------------------------|------------------------------------------------------|
| 0,0040  | Nucleosome assembly                                                   | Cenpo; Ruvbl1; Cenpk                                 |
| 0,0040  | TAK1 activates NFkB by phosphorylation and activation of IKKs complex | Neb2; Ripk2; Hmgb1                                   |
| 0,0046  | RNA transport --- Mus musculus (mouse)                                | Nup54; Eef1a1; Rpp30; Gemin6; Gemin7; Alyref2; Eif3a |
| 0,0065  | Activation, myristoylation of BID and translocation to mitochondria   | Gzmf; Gzmc                                           |
| 0,0065  | Calcitonin-like ligand receptors                                      | Ramp1; Ramp3                                         |
| 0,0077  | TRAF6 Mediated Induction of proinflammatory cytokines                 | Map2k2; Neb2; Ripk2; Hmgb1                           |
| 0,0079  | Recruitment of NuMA to mitotic centrosomes                            | Tubgcp2; Tubgcp6                                     |
| 0,0085  | Signal transduction by L1                                             | Map2k2; Itgb3; Ap2a1                                 |

### Supplementary Table 3: *Nr2f6*<sup>+/+</sup> PD-L1 vs *Nr2f6*<sup>+/+</sup> IgG2b

| p-value | pathway                                                               | associated genes                                                       |
|---------|-----------------------------------------------------------------------|------------------------------------------------------------------------|
| 0,0002  | Chromosome Maintenance                                                | Cenpo; Ruvbl1; Rfc2; Hist1h3c; Pole; Atr                               |
| 0,0002  | Ribosome --- Mus musculus (mouse)                                     | Rpl22l1; Mrpl11; Mrpl22; Rpl36; Rpl37; Mrps18a; Mrpl2                  |
| 0,0004  | glycolysis V (Pyrococcus)                                             | Aldoc; Pgam1; Pkm                                                      |
| 0,0008  | Oxidative phosphorylation                                             | Ndufs6; Nduh2; Ndufa8; Atp5l                                           |
| 0,0009  | Fanconi Anemia pathway                                                | Fancf; Atr; Fanci                                                      |
| 0,0022  | DNA Repair                                                            | Fancf; Pole; Atr; Fanci; Rfc2                                          |
| 0,0023  | Glycolysis                                                            | Aldoc; Pkm; Pgam1                                                      |
| 0,0025  | Cell Cycle                                                            | Cenpo; Ruvbl1; Cdc25a; Nup85; Rfc2; Hist1h3c; Pole; Atr; Cdca8; Anapc7 |
| 0,0037  | Cell Cycle Checkpoints                                                | Cdc25a; Atr; Anapc7; Rfc2                                              |
| 0,0068  | Electron Transport Chain                                              | Nduh2; Ndufa8; Ndufs6; Atp5l                                           |
| 0,0080  | Gap---filling DNA repair synthesis and ligation in GG---NER, TC---NER | Pole; Rfc2                                                             |

## Supplementary Table 4: *Nr2f6*<sup>+/+</sup> PD-L1 vs *Nr2f6*<sup>+/+</sup> IgG2b

| p-value | pathway                                                  | associated genes                                                                                                                                                                                                   |
|---------|----------------------------------------------------------|--------------------------------------------------------------------------------------------------------------------------------------------------------------------------------------------------------------------|
| 0,0000  | Osteoclast differentiation                               | Nfatc2; Fcgr4; Socs3; Sirpa; Fos; Tyrobp; Fosb; Junb; Jun; Cybb; Syk; Fosl2; Ppp3cc; Fcgr3                                                                                                                         |
| 0,0000  | Cytokine---cytokine receptor interaction                 | Il7r; Ccl2; Csf2ra; Ccl6; Il6ra; Il10rb; Ccl8; Ccl9; Ccr7; Tnfrsf21; Cxcl1; Ppbp; Cxcr4; Tnfrsf13b; Ccl7                                                                                                           |
| 0,0000  | Classical antibody---mediated complement activation      | Igkc; C1qc; C1qb; C1qa                                                                                                                                                                                             |
| 0,0000  | IL---6 signaling Pathway                                 | Il6ra; Socs3; Fos; Jun; Fgr; Ar; Hck; Lyn; Crebbp                                                                                                                                                                  |
| 0,0000  | Immune System                                            | Ifitm2; Il6ra; Socs3; Fos; Tyrobp; C1qc; Camk2b; Csf2ra; Bcl10; Cd74; Lgmn; Syk; Jun; C1qb; C1qa; H2---Eb1; Rnf41; Il7r; Nfatc2; Nr4a1; Map3k1; H2---Aa; H2---DMb1; Tnfaip3; Lyn; Crebbp; App; Cybb; Unc93b1; Igkc |
| 0,0000  | Chemokine signaling pathway                              | Ccl2; Cxcl1; Cclt9 Ccl6; Ccl7; Ccl8; Cxcr4; Fgr; Ppbp; Ccr7; Hck; Lyn                                                                                                                                              |
| 0,0000  | Intestinal immune network for IgA production             | H2---Ab1; H2---Aa; H2---DMb1; H2---Eb1; Cxcr4; Tnfrsf13b                                                                                                                                                           |
| 0,0001  | Creation of C4 and C2 activators                         | Igkc; C1qc; C1qb; C1qa                                                                                                                                                                                             |
| 0,0001  | B cell receptor signaling pathway                        | Nfatc2; Fos; Syk; Jun; Lyn; Ppp3cc; Bcl10                                                                                                                                                                          |
| 0,0002  | T Cell Receptor Signaling Pathway                        | Nfatc2; Fos; Syk; Map3k1; Jun; Lax1; Lyn; Bcl10; Crebbp                                                                                                                                                            |
| 0,0003  | TNF signaling pathway                                    | Ccl2; Cxcl1; Socs3; Fos; Junb; Jun; Tnfaip3; Ak4                                                                                                                                                                   |
| 0,0003  | Innate Immune System                                     | Nfatc2; Map3k1; Lyn; Lgmn; Fos; Syk; Jun; App; Nr4a1; C1qc; C1qb; C1qa; Tyrobp; Tnfaip3; Unc93b1; Igkc; Bcl10; Crebbp                                                                                              |
| 0,0003  | MHC class II antigen presentation                        | Cd74; H2---DMb1; H2---Aa; H2---Eb1; Lgmn                                                                                                                                                                           |
| 0,0010  | Antigen processing and presentation                      | Cd74; Lgmn; H2---Ab1; H2---Aa; H2---DMb1; H2---Eb1                                                                                                                                                                 |
| 0,0012  | Phagosome                                                | Mrc1; H2---Ab1; H2---Aa; Cybb; H2---DMb1; H2---Eb1; Fcgr4; Fcgr3; Msr1                                                                                                                                             |
| 0,0029  | MAPK signaling pathway                                   | Nr4a1; Fos; Map3k1; Jun; Dusp5; Ak4; Ppp3cc; Dusp1                                                                                                                                                                 |
| 0,0037  | IL---5 Signaling Pathway                                 | Syk; Hck; Lyn; Alox5ap; Jun                                                                                                                                                                                        |
| 0,0065  | Allograa rejection                                       | H2---Ab1; H2---DMb1; H2---Aa; H2---Eb1                                                                                                                                                                             |
| 0,0075  | Graa---versus---host disease                             | H2---Ab1; H2---DMb1; H2---Aa; H2---Eb1                                                                                                                                                                             |
| 0,0079  | Natural killer cell mediated cytotoxicity                | Nfatc2; Fcgr4; Tyrobp; Fcer1g; Syk; Ppp3cc                                                                                                                                                                         |
| 0,0080  | TGF Beta Signaling Pathway                               | Jun; Crebbp; Tgif1; Fos                                                                                                                                                                                            |
| 0,0082  | Adaptive Immune System                                   | Cd74; Ifitm2; Socs3; Lgmn; Syk; Nr4a1; H2---Aa; Rnf41; Cybb; H2---DMb1; Lyn; H2---Eb1; Igkc; Bcl10                                                                                                                 |
| 0,0086  | Lipoprotein metabolism                                   | Apoe; Pltp; Lpl                                                                                                                                                                                                    |
| 0,0086  | Oxidative Stress                                         | Junb; Hmox1; Fos                                                                                                                                                                                                   |
| 0,0096  | Interleukin---6 signaling                                | Il6ra; Socs3                                                                                                                                                                                                       |
| 0,0096  | Translocation of ZAP---70 to Immunological synapse       | H2---Aa; H2---Eb1                                                                                                                                                                                                  |
| 0,0096  | Activation of the AP---1 family of transcription factors | Jun; Fos                                                                                                                                                                                                           |

### Supplementary Table 5: *Nr2f6*<sup>-/-</sup> PD-L1 vs *Nr2f6*<sup>-/-</sup> IgG2b

| p-value | pathway                                                      | associated genes                                                                                                                                  |
|---------|--------------------------------------------------------------|---------------------------------------------------------------------------------------------------------------------------------------------------|
| 0,0000  | Asparagine N-linked glycosylation                            | Man2a2; Alg5; Edem3; Gfpt1; B4galt3; Alg14; Dpm1; Fut8                                                                                            |
| 0,0001  | N-Glycan biosynthesis                                        | Man2a2; Alg5; B4galt3; Alg14; Dpm1; Fut8                                                                                                          |
| 0,0001  | Post-translational protein modification                      | Sumf1; Man2a2; Pigm; Edem3; Gfpt1; B4galt3; Alg5; Alg14; Dpm1; Fut8                                                                               |
| 0,0001  | SNARE interactions in vesicular transport                    | Gosr2; Gosr1; Bnip1; Bet1; Stx16                                                                                                                  |
| 0,0003  | dolichyl-diphosphooligosaccharide biosynthesis               | Pigm; Dpm1; Alg5                                                                                                                                  |
| 0,0011  | Reactions specific to the complex N-glycan synthesis pathway | Man2a2; Fut8                                                                                                                                      |
| 0,0015  | Synthesis of substrates in N-glycan biosynthesis             | Gfpt1; Dpm1; Alg5                                                                                                                                 |
| 0,0050  | fa+γ acid & β-oxidation IV (unsaturated, even number)        | Decr2; Hadha                                                                                                                                      |
| 0,0053  | 3-phosphoinositide biosynthesis                              | Pik3c3; Pi4kb; Pik3ip1                                                                                                                            |
| 0,0056  | Separation of Sister Chromatids                              | Ube2c; Sgol1; Cdc20; Cdca5; Ckap5; Cenpp                                                                                                          |
| 0,0074  | Mitotic Metaphase and Anaphase                               | Ube2c; Sgol1; Cdc20; Cdca5; Ckap5; Cenpp                                                                                                          |
| 0,0078  | NOD-like receptor signaling pathway--Mus musculus (mouse)    | Mapk14; Pstpip1; Nod1; Ccl5                                                                                                                       |
| 0,0089  | Immune System                                                | Klrc1; Rps6ka1; Pdgh; Asb6; Arih2; Lat2; Amica1; H2-T23; Tec; Cttd; Cdc20; Ripk1; Mapk14; Nod1; Pstpip1; Lat; Flnb; Pik3c3; Cd200r4; Pton1; Ppm1b |

**Supplementary Table 6: *Nr2f6*<sup>-/-</sup> PD-L1 vs *Nr2f6*<sup>-/-</sup> IgG2b**

| p-value | pathway                                                              | associated genes                                                                                                                                  |
|---------|----------------------------------------------------------------------|---------------------------------------------------------------------------------------------------------------------------------------------------|
| 0,0001  | Formyl peptide receptors bind formyl peptides and many other ligands | Anxa1; App; Ccl9; Ccl6                                                                                                                            |
| 0,0001  | Antigen processing and presentation                                  | Cd74; Lgmn; H2--Ab1; H2--Aa; Ifi30; H2--DMb1; H2--Eb1; Ctss                                                                                       |
| 0,0001  | Innate Immune System                                                 | Lgmn; Ube2n; Tyrobp; C1qc; Tnfaip3; P2rx7; Trim32; Nebia; Jun; C1qb; Itgam; Ctss; Dtx4; Tank; Cdkn1a; Nr4a1; Mnda; Itpr1; App; Unc93b1; Fos; Ly86 |
| 0,0001  | Osteoclast differentiation                                           | Itgb3; Sirpa; Fos; Tyrobp; Csf1r; Fosb; Nebia; Jun; Fosl2; Fcgr3                                                                                  |
| 0,0001  | TGF--beta Receptor Signaling Pathway                                 | Snx2; Fos; Cd44; Fosb; Kpnb1; Jun; Pias2; Skil; Dab2; Cdkn1a; Tgif1                                                                               |
| 0,0001  | Toll--Like Receptors Cascades                                        | Nebia; Lgmn; Fos; App; Ube2n; Jun; Itgam; Unc93b1; Ctss; Ly86                                                                                     |
| 0,0007  | Adaptive Immune System                                               | Cd74; Ifitm3; Nebia; Lgmn; Ube2n; Cd81; Trim32; Cdkn1a; Nr4a1; H2--Aa; Ifi30; H2--DMb1; Ctss; H2--Eb1; Wsb1; Itpr1; Mgrn1; Pja2; Klh9             |
| 0,0010  | Inte9nal immune network for IgA production                           | H2--Aa; H2--DMb1; Tnfrsf13b; H2--Eb1; H2--Ab1                                                                                                     |
| 0,0013  | Trafficking and processing of endosomal TLR                          | Unc93b1; Ctss; Lgmn                                                                                                                               |
| 0,0023  | Chemokine signaling pathway                                          | Ccl2; Ccl1; Ccl6; Ccl8; Nebia; Tiam1; Ccl9; Ccr7; Cxcl10; Gnai3                                                                                   |
| 0,0032  | Cytokine--cytokine receptor interaction                              | Csf2rb; Il2ra; Ccl1; Ccl6; Ccl8; Ccl9; Csf1r; Ccl2; Tnfrsf9; Ccr7; Cxcl10; Tnfrsf13b                                                              |
| 0,0032  | Downstream TCR signaling                                             | Nebia; H2--Aa; H2--Eb1; Ube2n                                                                                                                     |
| 0,0034  | Signal regulatory protein (SIRP) family interactions                 | Tyrobp; Sirpa                                                                                                                                     |
| 0,0038  | Toll Like Receptor 4 (TLR4) Cascade                                  | Nebia; Fos; App; Ube2n; Jun; Itgam; Ly86                                                                                                          |
| 0,0044  | TNF signaling pathway                                                | Ccl2; Casp3; Fos; Nebia; Jun; Tnfaip3; Cxcl10                                                                                                     |
| 0,0049  | Phagosome                                                            | Itgb3; H2--Ab1; H2--Aa; H2--DMb1; Tfrc; Itgam; Ctss; Fcgr3; H2--Eb1                                                                               |
| 0,0059  | Hypertrophy Model                                                    | Dusp14; Ifrd1; Nr4a3                                                                                                                              |
| 0,0087  | Downregulation of SMAD2/3:SMAD4 transcriptional activity             | Trim33; Skil; Tgif1                                                                                                                               |
| 0,0089  | IL--5 Signaling Pathway                                              | Csf2rb; Nebia; Jun; Itgam; Alox5ap                                                                                                                |
| 0,0091  | Apoptosis induced DNA fragmentation                                  | Kpnb1; Casp3                                                                                                                                      |
| 0,0098  | RIG--I/MDA5 mediated induction of IFN--alpha/beta pathways           | App; Nebia; Tank; Tnfaip3                                                                                                                         |
